# Supplementary material for: Developmental changes and organelle biogenesis in the reproductive organs of thermogenic skunk cabbage (Symplocarpus renifolius)
Source: PubMed Central journal article supplement — J Exp Bot. 2009 Jul 29;60(13):3909–22. doi: 10.1093/jxb/erp226 (PMC2736897; doi:10.1093/jxb/erp226), 2009-07-29
Supplement: erp226_1.pdf [file erp226_1.pdf]

Supplemental material for manuscript:

Developmental changes and organelle biogenesis in the reproductive organs of thermogenic skunk cabbage (*Symplocarpus renifolius*)

Yasuko Ito-Inaba<sup>1</sup>, Mayuko Sato<sup>2, 6</sup>, Hiromi Masuko<sup>3, 6</sup>, Yamato Hida<sup>1</sup>, Kiminori Toyooka<sup>2</sup>, Masao Watanabe<sup>3, 4, 5</sup>, Takehito Inaba<sup>1, 5</sup>

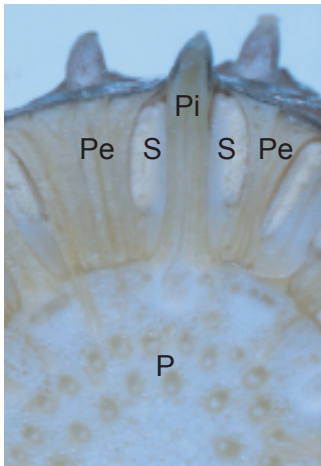

Supplementary figure

Fig. S1. Cross-sectional structure of the female-stage spadix. Pe; petal, Pi; pistil, S; stamen, P; pith.
